## CORRECTION

# Correction: Plant traits linked to field-scale flammability metrics in prescribed burns in *Eucalyptus* forest

The PLOS ONE Staff

The second sentence of the caption for [Table 1](#) incorrectly appears as a subsection of the Introduction titled “The direction of correlation with the plant trait and the flammability metric tested is shown in brackets.” Please see the complete, correct [Table 1](#) caption here.

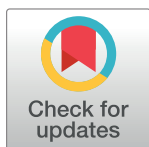

## OPEN ACCESS

**Citation:** The PLOS ONE Staff (2019) Correction: Plant traits linked to field-scale flammability metrics in prescribed burns in *Eucalyptus* forest. PLoS ONE 14(9): e0223401. <https://doi.org/10.1371/journal.pone.0223401>

**Published:** September 30, 2019

**Copyright:** © 2019 The PLOS ONE Staff. This is an open access article distributed under the terms of the [Creative Commons Attribution License](#), which permits unrestricted use, distribution, and reproduction in any medium, provided the original author and source are credited.

**Table 1. Summary of plant flammability findings for laboratory studies of live plant traits.** The direction of correlation with the plant trait and the flammability metric tested is shown in brackets.

| Plant trait                                           | Definition of trait                                                                                                                                                                      | Correlation with plant flammability    | Works describing the plant trait and plant flammability association |
|-------------------------------------------------------|------------------------------------------------------------------------------------------------------------------------------------------------------------------------------------------|----------------------------------------|---------------------------------------------------------------------|
| Ash quantity (%)                                      | Percent of mineral content remaining after combustion determined as a ratio of oven dry weight                                                                                           | (-) combustibility                     | [11,12,27–30]                                                       |
| Bulk density <sup>1</sup> (g cm <sup>3</sup> )        | Amount of oven dry biomass per volume of airspace                                                                                                                                        | Undetermined in the laboratory         | [24,25,31,32]                                                       |
| Extractives <sup>2</sup> (mg gDW <sup>-1</sup> )      | Amount of volatile compounds including waxes, fats, oils and terpenes. Typically, only terpenes are considered, or no distinction is made between terpenes and other volatile compounds. | (+) ignitability<br>(+) combustibility | [12,14,33–37]                                                       |
| Fuel moisture content <sup>3</sup> (%)                | Percent of water in a plant organ determined as a ratio of dry weight.                                                                                                                   | (-) ignitability<br>(-) combustibility | [16,17,30,37–41]                                                    |
| Specific leaf area (cm <sup>2</sup> g <sup>-1</sup> ) | The one-sided area of a fresh leaf, divided by its oven dry weight                                                                                                                       | (+) ignitability                       | [15,16,42]                                                          |
| Surface area (cm <sup>2</sup> )                       | The total area of a plant organ, typically leaves                                                                                                                                        | (+) ignitability                       | [16,43–45]                                                          |
| Surface area to volume ratio (cm <sup>-1</sup> )      | Ratio between surface area and total volume of a plant organ                                                                                                                             | (+) ignitability<br>(+) combustibility | [17,29,46,47]                                                       |
| Thickness (cm)                                        | Width of the plant organ                                                                                                                                                                 | (-) ignitability                       | [13,48]                                                             |

<sup>1</sup> Bulk density has a parabolic relationship with flame spread rate; it can be aeration or fuel limiting and its effect depends on the fuel layer being investigated. It has been extensively studied in the laboratory for leaf litter.

<sup>2</sup> Several plant flammability studies that include volatile compounds are inconclusive about their importance.

<sup>3</sup> The effects of fuel moisture content (FMC) is not always consistent, as some live fuels can burn intensely at high FMC.

<https://doi.org/10.1371/journal.pone.0223401.t001>

The third and fourth sentences of the caption for [Table 6](#) incorrectly appear below the table. Please see the complete, correct [Table 6](#) caption here.

**Table 6. Correlation coefficients as determined by the fourth-corner analysis.** Significant ( $P < 0.05$ ) positive associations are represented by orange cells and significant negative associations are represented by blue cells. Non-significant associations are blank. P-values were adjusted for multiple comparisons using FDR (false discovery rate) procedures.

|                              | Char height | Percentage burnt | Scorch height |
|------------------------------|-------------|------------------|---------------|
| Ash quantity                 | 0.08        | -0.01            | 0.01          |
| Bulk density                 | 0.36        | 0.34             | 0.26          |
| Fuel moisture content        | -0.19       | -0.18            | -0.12         |
| Hydrocarbon                  | -0.30       | -0.32            | -0.26         |
| Surface area                 | -0.25       | -0.34            | -0.25         |
| Specific leaf area           | -0.36       | -0.35            | -0.31         |
| Surface area to volume ratio | -0.39       | -0.34            | -0.39         |
| Terpene                      | 0.26        | 0.29             | 0.24          |
| Thickness                    | -0.16       | -0.14            | -0.12         |

<https://doi.org/10.1371/journal.pone.0223401.t002>

The publisher apologizes for these errors.

## Reference

1. Tumino BJ, Duff TJ, Goodger JQD, Cawson JG (2019) Plant traits linked to field-scale flammability metrics in prescribed burns in *Eucalyptus* forest. PLoS ONE 14(8): e0221403. <https://doi.org/10.1371/journal.pone.0221403> PMID: 31449564
